# Supplementary material for: Characterization of Cancer Stem-Like Cells Derived from Mouse Induced Pluripotent Stem Cells Transformed by Tumor-Derived Extracellular Vesicles
Source: PubMed Central journal article supplement — J Cancer. 2014 Jul 5;5(7):572–84. doi: 10.7150/jca.8865 (PMC4107233; doi:10.7150/jca.8865), 2014-07-05
Supplement: jcav05p0572s1.pdf [file jcav05p0572s1.pdf]

## Supplementary Table S1. Primer sequences for qRT-PCR.

| No.       | Symbol | Accession   | Primers                                                                             | Applications             |
|-----------|--------|-------------|-------------------------------------------------------------------------------------|--------------------------|
| <b>1</b>  | Oct3/4 | NM_013633.2 | CTG AGG GCC AGG CAG GAG CAC GAG<br>CTG TAG GGA GGG CTT CGG GCA CTT                  | Total <i>Oct3/4</i>      |
| <b>2</b>  | Oct3/4 | NM_013633.2 | TCT TTC CAC CAG GCC CCC GGC TC<br>TGC GGG CGG ACA TGG GGA GAT CC                    | Endogenous <i>Oct3/4</i> |
| <b>3</b>  | Sox2   | NM_011443.3 | GGT TAC CTC TTC CTC CCA CTC CAG<br>TCA CAT GTG CGA CAG GGG CAG                      | Total <i>Sox2</i>        |
| <b>4</b>  | Sox2   | NM_011443.3 | TAG AGC TAG ACT CCG GGC GAT GA<br>TTG CCT TAA ACA AGA CCA CGA AA                    | Endogenous <i>Sox2</i>   |
| <b>5</b>  | Klf4   | NM_010637.3 | CAC CAT GGA CCC GGG CGT GGC TGC CAG AAA<br>TTA GGC TGT TCT TTT CCG GGG CCA CGA      | Total <i>Klf4</i>        |
| <b>6</b>  | Klf4*  | NM_010637.3 | GCG AAC TCA CAC AGG CGA GAA ACC<br>TCG CTT CCT CTT CCT CCG ACA CA                   | Endogenous <i>Klf4</i>   |
| <b>7</b>  | c-Myc  | NM_010849.4 | CAG AGG AGG AAC GAG CTG AAG CGC<br>TTA TGC ACC AGA GTT TCG AAG CTG TTC G            | Total <i>c-Myc</i>       |
| <b>8</b>  | c-Myc  | NM_010849.4 | TGA CCT AAC TCG AGG AGG AGC TGG AAT C<br>AAG TTT GAG GCA GTT AAA ATT ATG GCT GAA GC | Endogenous <i>c-Myc</i>  |
| <b>9</b>  | Gapdh* | NM_008084.2 | AAC GGC ACA GTC AAG GCC GA<br>ACC CTT TTG GCT CCA CCC TT                            | <i>Gapdh</i>             |
| <b>10</b> | Oct3/4 |             | TTG GGC TAG AGA AGG ATG TGG TTC<br>TTA TCG TCG ACC ACT GTG CTG CTG                  | <i>Oct3/4</i> transgene  |
| <b>11</b> | Sox2   |             | GGT TAC CTC TTC CTC CCA CTC CAG<br>TTA TCG TCG ACC ACT GTG CTG CTG                  | <i>Sox2</i> transgene    |
| <b>12</b> | Klf4   |             | GCG AAC TCA CAC AGG CGA GAA ACC<br>TTA TCG TCG ACC ACT GTG CTG CTG                  | <i>Klf4</i> transgene    |
| <b>13</b> | c-Myc  |             | CAG AGG AGG AAC GAG CTG AAG CGC<br>TTA TCG TCG ACC ACT GTG CTG CTG                  | <i>c-Myc</i> transgene   |

\* These two primers were designed in this study; remains are followed Yamanaka's description [24].

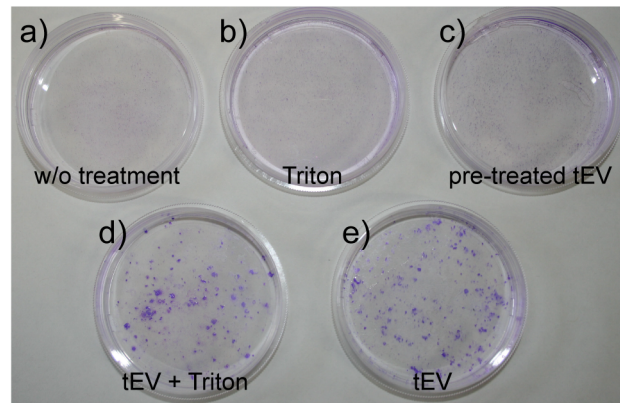

**Supplementary Figure S1. Colony formation by using detergent pre-treated tEVs.**

LLC derived tEVs ( $0.05 \mu\text{g}/\mu\text{L}$ ) was incubated with 0.5% Triton X-100 for 5 h in  $4^\circ\text{C}$ . Then, we treated cells with detergent pre-treated tEVs (c), that amount was corresponding to untreated tEVs ( $100\text{ng}/\text{mL}$ ) (e). As controls, cells were treated with untreated tEVs in the presence of 0.001% Triton X-100 (d) or 0.001% Triton X-100 (b). The detergent pre-treated tEVs are failed to induce the colony growth.

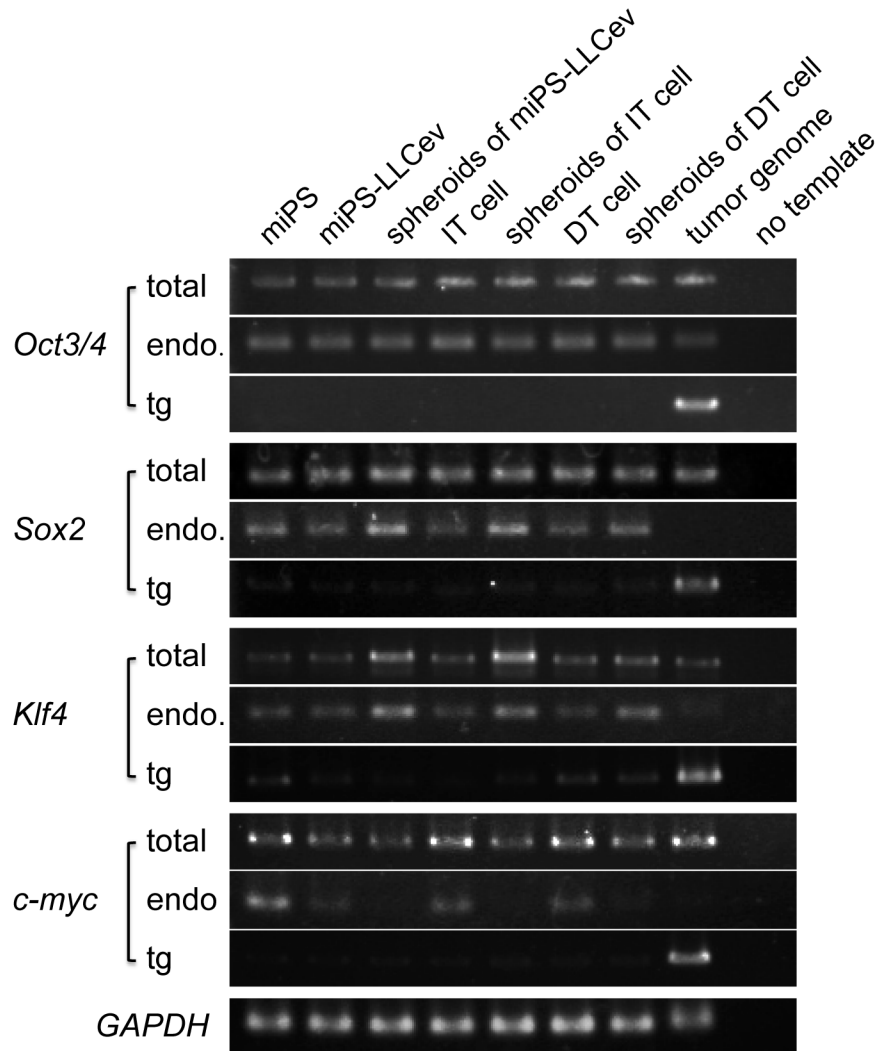

**Supplementary Figure S2. Semi-quantitative reverse-transcription PCR analysis of the four transcription factors in indicated samples.** The PCR products were the coding regions (Total), endogenous transcripts only (Endo.), and transgene transcripts only (tg). Genome DNA was used as positive control for transgene.

A

Transplanted

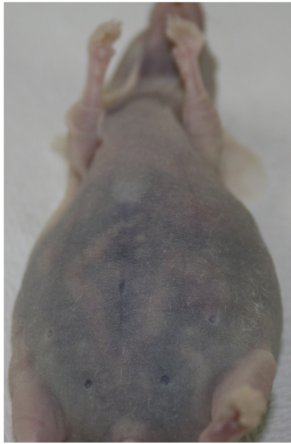

Control

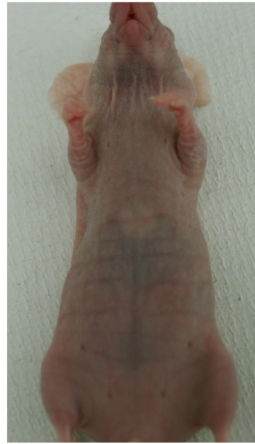

B

Disseminated tumors

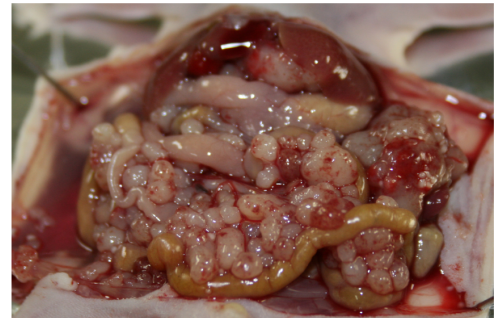

**Supplementary Figure S3. Disseminated tumors by injection of miPS-LLCev cells. (A)**

The disseminated tumors result in abdominal bleeding of mice. (B) The disseminated tumors on mesentery.

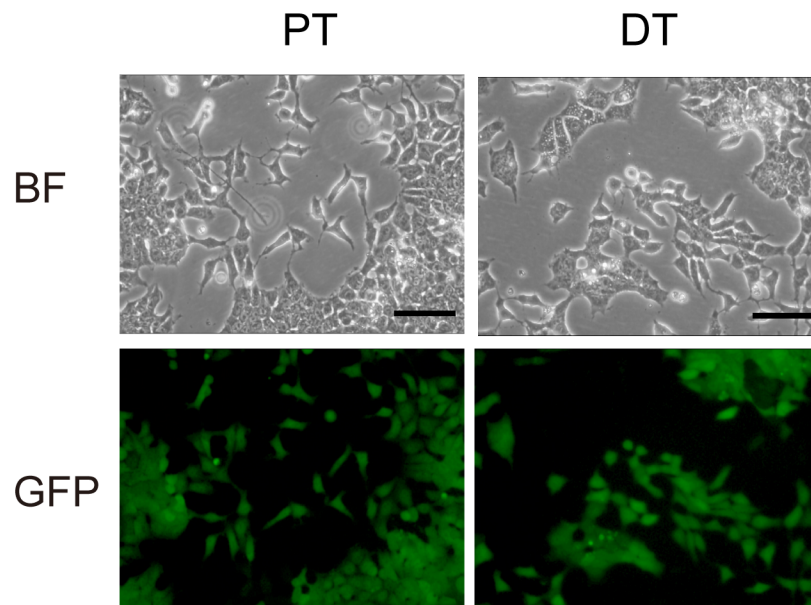

**Supplementary Figure S4.** Cell morphology of miPS-LLCevPT and miPS-LLCevDT cell lines, which were established from primary tumor and disseminated tumor nodules, respectively.
